# Supplementary material for: Exploring biphenyl-2,4,4′-tricarboxylic acid as a flexible building block for the hydrothermal self-assembly of diverse metal–organic and supramolecular networks
Source: Royal Society of Chemistry journal article supplement (doi:10.1039/c5ce02254a), 2015-12-18
Supplement: c5ce02254a1.pdf [file c5ce02254a1.pdf]

## Electronic Supplementary Information

### **Exploring biphenyl-2,4,4'-tricarboxylic acid as a flexible building block for the hydrothermal self-assembly of diverse metal-organic and supramolecular networks**

Yong-Liang Shao <sup>a</sup>, Yan-Hui Cui <sup>a</sup>, Jin-Zhong Gu <sup>a,\*</sup>, Jiang Wu <sup>a</sup>, Ya-Wen Wang <sup>a,\*</sup>, Alexander M.

Kirillov <sup>b</sup>

<sup>a</sup>Key Laboratory of Nonferrous Metal Chemistry and Resources Utilization of Gansu Province and College of Chemistry and Chemical Engineering, Lanzhou University, Lanzhou, 730000 (P. R. China)

<sup>b</sup>Centro de Química Estrutural, Complexo I, Instituto Superior Técnico, The University of Lisbon, Av. Rovisco Pais, 1049-001, Lisbon (Portugal)

Fax: (+86) 931-891-5196

E-mail: gujzh@lzu.edu.cn; ywwang@lzu.edu.cn

**Table S1** Selected bond lengths [Å] and angles [°] for the compounds **1-9<sup>a</sup>**.

| <b>1</b>            |          |                     |           |                    |           |
|---------------------|----------|---------------------|-----------|--------------------|-----------|
| Zn(1)-O(1)          | 2.172(4) | Zn(1)-O(2)          | 2.260(4)  | Zn(1)-N(1)         | 2.113(6)  |
| Zn(1)-N(2)          | 2.096(5) | Zn(1)-N(3)          | 2.101(6)  | Zn(1)-N(4)         | 2.156(5)  |
| N(2)-Zn(1)-N(3)     | 100.2(2) | N(2)-Zn(1)-N(1)     | 79.2(2)   | N(3)-Zn(1)-N(1)    | 97.4(2)   |
| N(2)-Zn(1)-N(4)     | 94.0(2)  | N(3)-Zn(1)-N(4)     | 78.6(2)   | N(1)-Zn(1)-N(4)    | 171.4(2)  |
| N(2)-Zn(1)-O(1)     | 108.0(2) | N(3)-Zn(1)-O(1)     | 149.2 (2) | N(1)-Zn(1)-O(1)    | 99.9(2)   |
| N(4)-Zn(1)-O(1)     | 87.1(2)  | N(2)-Zn(1)-O(2)     | 164.5(2)  | N(3)-Zn(1)-O(2)    | 94.6(2)   |
| N(1)-Zn(1)-O(2)     | 94.3(2)  | N(4)-Zn(1)-O(2)     | 93.5 (2)  | O(1)-Zn(1)-O(2)    | 59.0(2)   |
| <b>2</b>            |          |                     |           |                    |           |
| Co(1)-O(1)          | 2.210(4) | Co(1)-O(1)#1        | 2.210(4)  | Co(1)-N(1)         | 2.129(5)  |
| Co(1)-N(1)#1        | 2.129(5) | Co(1)-N(4)          | 2.126(5)  | Co(1)-N(4)#1       | 2.126(5)  |
| N(4)-Co(1)-N(1)     | 79.6(2)  | N(4)#1-Co(1)-N(1)   | 100.4(2)  | N(4)-Co(1)-O(1)    | 91.4(2)   |
| N(4)#1-Co(1)-O(1)   | 88.6(2)  | N(1)-Co(1)-O(1)#1   | 89.9(2)   | N(1)-Co(1)-O(1)    | 90.1(2)   |
| <b>3</b>            |          |                     |           |                    |           |
| Cd(1)-O(1)          | 2.443(4) | Cd(1)-O(1)#1        | 2.443(4)  | Cd(1)-N(1)         | 2.292(4)  |
| Cd(1)-N(1)#1        | 2.292(4) | Cd(1)-N(4)          | 2.299(5)  | Cd(1)-N(4)#1       | 2.299(5)  |
| N(1)-Cd(1)-N(4)     | 75.2(2)  | N(1)-Cd(1)-N(4)#1   | 104.8(2)  | N(1)-Cd(1)-O(1)    | 84.4(2)   |
| N(1)#1-Cd(1)-O(1)   | 95.6(2)  | N(4)-Cd(1)-O(1)     | 91.2(2)   | N(4)#1-Cd(1)-O(1)  | 88.8(2)   |
| <b>4</b>            |          |                     |           |                    |           |
| Ni(1)-O(1)          | 2.079(6) | Ni(1)-O(7)          | 2.074(6)  | Ni(1)-N(1)         | 2.111(8)  |
| Ni(1)-N(2)          | 2.095(7) | Ni(1)-N(3)          | 2.084(7)  | Ni(1)-N(4)         | 2.085(7)  |
| O(1)-Ni(1)-O(7)     | 90.7(2)  | O(1)-Ni(1)-N(3)     | 93.2(3)   | O(7)-Ni(1)-N(3)    | 100.1(3)  |
| O(1)-Ni(1)-N(1)     | 87.5(3)  | O(7)-Ni(1)-N(1)     | 168.9(2)  | N(3)-Ni(1)-N(1)    | 90.9(3)   |
| O(1)-Ni(1)-N(2)     | 90.1(2)  | O(7)-Ni(1)-N(2)     | 88.7(3)   | N(3)-Ni(1)-N(2)    | 170.5(3)  |
| N(1)-Ni(1)-N(2)     | 80.3(3)  | O(1)-Ni(1)-N(4)     | 173.0(3)  | O(7)-Ni(1)-N(4)    | 90.2(3)   |
| N(3)-Ni(1)-N(4)     | 79.8(3)  | N(1)-Ni(1)-N(4)     | 92.9(3)   | N(2)-Ni(1)-N(4)    | 96.9(3)   |
| <b>5</b>            |          |                     |           |                    |           |
| Cd(1)-O(1)          | 2.377(6) | Cd(1)-O(2)          | 2.350(8)  | Cd(1)-O(3)#1       | 2.291(7)  |
| Cd(1)-N(1)          | 2.399(9) | Cd(1)-N(2)          | 2.399(9)  | Cd(1)-Cl(1)        | 2.628(3)  |
| Cd(2)-O(4)#1        | 2.294(8) | Cd(2)-O(5)#2        | 2.271(6)  | Cd(2)-O(6)#2       | 2.468(9)  |
| Cd(2)-N(3)          | 2.357(9) | Cd(2)-N(4)          | 2.331(8)  | Cd(2)-Cl(1)        | 2.543(2)  |
| O(3)#1-Cd(1)-O(2)   | 89.4(3)  | O(3)#1-Cd(1)-O(1)   | 98.9(3)   | O(2)-Cd(1)-O(1)    | 55.3(3)   |
| O(3)#1-Cd(1)-N(1)   | 102.8(3) | O(2)-Cd(1)-N(1)     | 92.6(3)   | O(1)-Cd(1)-N(1)    | 140.9(3)  |
| O(3)#1-Cd(1)-N(2)   | 172.6(3) | O(2)-Cd(1)-N(2)     | 92.6(3)   | O(1)-Cd(1)-N(2)    | 88.1(3)   |
| N(1)-Cd(1)-N(2)     | 70.0(3)  | O(3)#1-Cd(1)-Cl(1)  | 97.9(2)   | O(2)-Cd(1)-Cl(1)   | 147.2(2)  |
| O(1)-Cd(1)-Cl(1)    | 92.0(2)  | N(1)-Cd(1)-Cl(1)    | 116.5(2)  | N(2)-Cd(1)-Cl(1)   | 84.2(2)   |
| O(5)#2-Cd(2)-O(4)#1 | 87.6(2)  | O(5)#2-Cd(2)-N(4)   | 142.4(3)  | O(4)#1-Cd(2)-N(4)  | 125.4(3)  |
| O(5)#2-Cd(2)-N(3)   | 100.7(3) | O(4)#1-Cd(2)-N(3)   | 80.8(3)   | N(4)-Cd(2)-N(3)    | 71.4(3)   |
| O(5)#2-Cd(2)-O(6)#2 | 54.6(3)  | O(4)#1-Cd(2)-O(6)#2 | 140.5(2)  | N(4)-Cd(2)-O(6)#2  | 94.0(3)   |
| N(3)-Cd(2)-O(6)#2   | 114.0(3) | O(5)#2-Cd(2)-Cl(1)  | 110.2(2)  | O(4)#1-Cd(2)-Cl(1) | 84.75(19) |
| N(4)-Cd(2)-Cl(1)    | 92.2(2)  | N(3)-Cd(2)-Cl(1)    | 145.2(2)  | O(6)#2-Cd(2)-Cl(1) | 97.1(2)   |
| Cd(2)-Cl(1)-Cd(1)   | 89.02(8) |                     |           |                    |           |
| <b>6</b>            |          |                     |           |                    |           |
| Ni(1)-O(1)          | 2.038(5) | Ni(1)-O(3)#1        | 2.050(4)  | Ni(1)-O(6)#2       | 2.056(5)  |
| Ni(1)-O(7)          | 2.144(5) | Ni(1)-O(8)          | 2.086(5)  | Ni(1)-N(1)         | 2.068(6)  |
| Ni(2)-O(4)#1        | 2.072(4) | Ni(2)-O(4)#3        | 2.072(4)  | Ni(2)-O(7)         | 2.071(5)  |

|                     |          |                     |          |                     |          |
|---------------------|----------|---------------------|----------|---------------------|----------|
| Ni(2)-O(7)#4        | 2.071(5) | Ni(2)-N(2)          | 2.137(5) | Ni(2)-N(2)#4        | 2.543(2) |
| O(1)-Ni(1)-O(3)#1   | 88.6(2)  | O(1)-Ni(1)-O(6)#2   | 93.4(2)  | O(1)-Ni(1)-O(7)     | 92.4(2)  |
| O(1)-Ni(1)-O(8)     | 173.9(2) | O(1)-Ni(1)-N(1)     | 86.8(2)  | O(1)#1-Ni(1)-O(6)#2 | 177.9(2) |
| O(3)#1-Ni(1)-O(7)   | 89.5(2)  | O(3)#1-Ni(1)-O(8)   | 88.1(2)  | O(1)#1-Ni(1)-N(1)   | 93.2(2)  |
| O(6)#2-Ni(1)-O(7)   | 90.6(2)  | O(6)#2-Ni(1)-O(8)   | 89.8(2)  | O(6)#2-Ni(1)-N(1)   | 86.7(2)  |
| O(8)-Ni(1)-O(7)     | 92.8(2)  | N(1)-Ni(1)-O(7)     | 177.1(2) | N(1)-Ni(1)-O(8)     | 88.2(2)  |
| O(4)#3-Ni(2)-O(4)#1 | 88.1(3)  | O(4)#3-Ni(2)-N(2)#4 | 176.3(6) | O(4)#3-Ni(2)-N(2)   | 89.7(2)  |
| O(4)#1-Ni(2)-N(2)#4 | 89.79(5) | O(4)#1-Ni(2)-N(2)   | 176.3(2) | O(7)#4-Ni(2)-O(4)#3 | 91.2(2)  |
| O(7)-Ni(2)-O(4)#3   | 86.6(2)  | O(7)#4-Ni(2)-O(4)#1 | 86.6(2)  | O(7)-Ni(2)-O(4)#1   | 91.2(2)  |
| O(7)-Ni(2)-O(7)#4   | 177.0(3) | O(7)-Ni(2)-N(2)     | 91.7(2)  | O(7)#4-Ni(2)-N(2)#4 | 91.6(7)  |
| O(7)#4-Ni(2)-N(2)   | 90.4(2)  | O(7)-Ni(2)-N(2)#4   | 90.4(7)  | N(2)#4-Ni(2)-N(2)   | 92.7(6)  |
| Ni(1)-O(7)-Ni(2)    | 123.7(2) |                     |          |                     |          |

## 7

|                   |          |                     |          |                     |          |
|-------------------|----------|---------------------|----------|---------------------|----------|
| Co(1)-O(1)        | 2.107(5) | Co(1)-O(1)#1        | 2.107(5) | Co(1)-O(8)          | 2.092(5) |
| Co(1)-O(8)#1      | 2.092(5) | Co(1)-N(1)          | 2.179(6) | Co(1)-N(1)#1        | 2.179(6) |
| Co(2)-O(2)        | 2.067(5) | Co(2)-O(4)#2        | 2.040(5) | Co(2)-O(6)#3        | 2.087(5) |
| Co(2)-O(7)        | 2.091(5) | Co(2)-O(8)          | 2.214(5) | Co(2)-N(2)          | 2.122(7) |
| O(1)-Co(1)-O(1)#1 | 87.4(3)  | O(1)-Co(1)-N(1)#1   | 175.3(2) | O(1)#1-Co(1)-N(1)#1 | 90.6(2)  |
| O(1)#1-Co(1)-N(1) | 175.3(2) | O(1)-Co(1)-N(1)     | 90.6(2)  | O(8)#1-Co(1)-O(1)   | 86.8(2)  |
| O(8)-Co(1)-O(1)#1 | 86.8(2)  | O(8)#1-Co(1)-O(1)#1 | 92.0(2)  | O(8)-Co(1)-O(1)     | 92.0(2)  |
| O(8)-Co(1)-O(8)#1 | 178.3(3) | O(8)-Co(1)-N(1)     | 89.1(2)  | O(8)#1-Co(1)-N(1)#1 | 89.1(2)  |
| O(8)#1-Co(1)-N(1) | 92.2(2)  | O(8)-Co(1)-N(1)#1   | 92.2(2)  | N(1)-Co(1)-N(1)#1   | 92.2(2)  |
| O(2)-Co(2)-O(6)#2 | 176.7(2) | O(2)-Co(2)-O(7)     | 86.4(2)  | O(2)-Co(2)-O(8)     | 90.3(2)  |
| O(2)-Co(2)-N(2)   | 93.8(2)  | O(4)#3-Co(2)-O(2)   | 89.4(2)  | O(4)#3-Co(2)-O(6)#2 | 93.9(2)  |
| O(4)#3-Co(2)-O(7) | 174.7(2) | O(4)#3-Co(2)-O(8)   | 92.4(2)  | O(4)#3-Co(2)-N(2)   | 86.9(2)  |
| O(6)#2-Co(2)-O(7) | 90.4(2)  | O(6)#2-Co(2)-O(8)   | 88.9(2)  | O(6)#2-Co(2)-N(2)   | 87.1(3)  |
| O(7)-Co(2)-O(8)   | 90.8(2)  | O(7)-Co(2)-N(2)     | 90.3(2)  | N(2)-Co(2)-O(8)     | 175.8(2) |
| Co(1)-O(8)-Co(2)  | 122.4(2) |                     |          |                     |          |

## 8

|                     |          |                      |          |                      |          |
|---------------------|----------|----------------------|----------|----------------------|----------|
| Co(1)-O(2)          | 2.136(5) | Co(1)-O(7)           | 2.071(5) | Co(1)-O(8)           | 2.169(5) |
| Co(1)-O(9)          | 2.056(5) | Co(1)-O(11)          | 2.144(5) | Co(1)-O(16)#1        | 2.028(5) |
| Co(2)-O(1)          | 2.091(5) | Co(2)-O(5)#2         | 2.046(5) | Co(2)-O(7)           | 2.090(5) |
| Co(2)-O(10)         | 2.182(5) | Co(2)-O(11)          | 2.133(5) | Co(2)-N(1)           | 2.110(7) |
| Co(3)-O(6)#2        | 2.224(6) | Co(3)-O(6)#5         | 2.224(6) | Co(3)-O(7)           | 1.964(5) |
| Co(3)-O(7)#3        | 1.964(5) | Co(3)-O(15)#1        | 2.153(5) | Co(3)-O(15)#4        | 2.153(5) |
| Co(4)-O(3)#7        | 2.024(6) | Co(4)-O(4)#6         | 2.002(6) | Co(4)-O(13)          | 2.035(5) |
| Co(4)-O(14)#8       | 2.026(5) | Co(4)-N(2)           | 2.074(6) |                      |          |
| O(16)#1-Co(1)-O(9)  | 89.0(2)  | O(16)#1-Co(1)-O(7)   | 92.1(2)  | O(9)-Co(1)-O(7)      | 178.0(2) |
| O(16)#1-Co(1)-O(2)  | 175.8(2) | O(9)-Co(1)-O(2)      | 94.3(2)  | O(7)-Co(1)-O(2)      | 84.7(2)  |
| O(16)#1-Co(1)-O(11) | 91.2(2)  | O(9)-Co(1)-O(11)     | 93.9(2)  | O(7)-Co(1)-O(11)     | 84.4(2)  |
| O(2)-Co(1)-O(11)    | 91.0(2)  | O(16)#1-Co(1)-O(8)   | 94.2(2)  | O(9)-Co(1)-O(8)      | 86.3(2)  |
| O(7)-Co(1)-O(8)     | 95.2(2)  | O(2)-Co(1)-O(8)      | 83.6(2)  | O(11)-Co(1)-O(8)     | 174.6(2) |
| O(5)#2-Co(2)-O(7)   | 91.9(2)  | O(5)#2-Co(2)-O(1)    | 176.1(2) | O(7)-Co(2)-O(1)      | 84.2(2)  |
| O(5)#2-Co(2)-N(1)   | 91.1(2)  | O(7)-Co(2)-N(1)      | 176.7(2) | O(1)-Co(2)-N(1)      | 92.8(2)  |
| O(5)#2-Co(2)-O(11)  | 88.3(2)  | O(7)-Co(2)-O(11)     | 84.3(2)  | O(1)-Co(2)-O(11)     | 91.8(2)  |
| N(1)-Co(2)-O(11)    | 97.1(2)  | O(5)#2-Co(2)-O(10)   | 92.0(2)  | O(7)-Co(2)-O(10)     | 90.2(2)  |
| O(1)-Co(2)-O(10)    | 87.5(2)  | N(1)-Co(2)-O(10)     | 88.4(2)  | O(11)-Co(2)-O(10)    | 174.5(2) |
| O(7)-Co(3)-O(15)#1  | 93.6(2)  | O(7)-Co(3)-O(15)#4   | 86.4(2)  | O(7)#3-Co(3)-O(6)#5  | 94.1(2)  |
| O(7)-Co(3)-O(6)#5   | 85.9(2)  | O(15)#4-Co(3)-O(6)#5 | 86.0(2)  | O(15)#1-Co(3)-O(6)#5 | 94.0(2)  |

|                     |          |                      |          |                      |          |
|---------------------|----------|----------------------|----------|----------------------|----------|
| O(4)#6-Co(4)-O(3)#7 | 163.3(2) | O(4)#6-Co(4)-O(14)#8 | 88.3(3)  | O(3)#7-Co(4)-O(14)#8 | 90.5(3)  |
| O(4)#6-Co(4)-O(13)  | 88.7(2)  | O(3)#7-Co(4)-O(13)   | 87.8(3)  | O(14)#8-Co(4)-O(13)  | 163.5(2) |
| O(4)#6-Co(4)-N(2)   | 102.1(3) | O(3)#7-Co(4)-N(2)    | 94.5(2)  | O(14)#8-Co(4)-N(2)   | 99.9(2)  |
| O(13)-Co(4)-N(2)    | 96.6(2)  | Co(3)-O(7)-Co(1)     | 126.9(3) | Co(3)-O(7)-Co(2)     | 123.6(2) |
| Co(1)-O(7)-Co(2)    | 95.9(2)  |                      |          |                      |          |

## 9

|                      |          |                      |          |                       |          |
|----------------------|----------|----------------------|----------|-----------------------|----------|
| Pb(1)-O(1)           | 2.614(5) | Pb(1)-O(2)           | 2.369(5) | Pb(1)-O(5)#3          | 2.643(5) |
| Pb(1)-O(9)#1         | 2.613(5) | Pb(1)-O(10)#1        | 2.477(5) | Pb(1)-O(10)#2         | 2.555(5) |
| Pb(2)-O(5)           | 2.412(5) | Pb(2)-O(6)#4         | 2.484(5) | Pb(2)-O(7)            | 2.379(5) |
| Pb(2)-O(9)#8         | 2.863(5) | Pb(2)-O(13)          | 2.495(5) | Pb(3)-O(3)#6          | 2.468(5) |
| Pb(3)-O(4)#6         | 2.493(5) | Pb(3)-O(4)#7         | 2.566(5) | Pb(3)-O(8)            | 2.543(5) |
| Pb(3)-O(11)#5        | 2.319(5) | O(2)-Pb(1)-O(10)#2   | 79.4(2)  | O(10)#1-Pb(1)-O(10)#2 | 65.2(2)  |
| O(2)-Pb(1)-O(10)#1   | 78.2(2)  | O(10)#1-Pb(1)-O(1)   | 124.5(2) | O(10)#2-Pb(1)-O(1)    | 80.9(2)  |
| O(2)-Pb(1)-O(1)      | 52.2(2)  | O(10)#1-Pb(1)-O(9)#1 | 51.0(2)  | O(10)#2-Pb(1)-O(9)#1  | 115.3(2) |
| O(2)-Pb(1)-O(9)#1    | 78.6(2)  | O(2)-Pb(1)-O(5)#3    | 75.0(2)  | O(10)#1-Pb(1)-O(5)#3  | 120.3(2) |
| O(1)-Pb(1)-O(9)#1    | 125.4(2) | O(1)-Pb(1)-O(5)#3    | 73.6(2)  | O(9)#1-Pb(1)-O(5)#3   | 71.8(2)  |
| O(10)#2-Pb(1)-O(5)#3 | 151.5(2) | O(7)-Pb(2)-O(6)#4    | 130.8(2) | O(5)-Pb(2)-O(6)#4     | 81.9(2)  |
| O(7)-Pb(2)-O(5)      | 75.8(2)  | O(5)-Pb(2)-O(13)     | 114.2(2) | O(6)#4-Pb(2)-O(13)    | 72.4(2)  |
| O(7)-Pb(2)-O(13)     | 77.7(2)  | O(11)#5-Pb(3)-O(4)#6 | 80.4(2)  | O(3)#6-Pb(3)-O(4)#6   | 51.9(2)  |
| O(11)#5-Pb(3)-O(3)#6 | 94.5(2)  | O(3)#6-Pb(3)-O(8)    | 73.3(2)  | O(4)#6-Pb(3)-O(8)     | 119.1(2) |
| O(11)#5-Pb(3)-O(8)   | 79.6(2)  | O(3)#6-Pb(3)-O(4)#7  | 115.2(2) | O(4)#6-Pb(3)-O(4)#7   | 63.4(2)  |
| O(11)#5-Pb(3)-O(4)#7 | 76.2(2)  | Pb(2)-O(5)-Pb(1)#5   | 102.3(2) | Pb(1)#9-O(10)-Pb(1)#7 | 114.8(2) |
| O(8)-Pb(3)-O(4)#7    | 154.8(2) | Pb(3)#8-O(4)-Pb(3)#2 | 116.6(2) |                       |          |

<sup>a</sup> Symmetry transformations used to generate equivalent atoms: #1  $-x+1, -y+2, -z$  for **2**; #1  $-x+1, -y+1, -z+1$  for **3**; #1  $x, y-1, z$ ; #2  $-x+1, -y, z+1/2$  for **5**; #1  $-x+1/2, y-1/2, -z+1/2$ ; #2  $-x+1/2, -y+3/2, -z$ ; #3  $x+1/2, y-1/2, z$ ; #4  $-x+1, y, -z+1/2$  for **6**; #1  $-x, y, -z+1/2$ ; #2  $x, -y+2, z+1/2$ ; #3  $-x+1/2, y-1/2, -z+1/2$  for **7**; #1  $-x, -y+1, -z+1$ ; #2  $x, y, z+1$ ; #3  $-x, -y+2, -z$ ; #4  $x, y+1, z-1$ ; #5  $-x, -y+2, -z-1$ ; #6  $-x+1, -y+1, -z$ ; #7  $x, y-1, z+1$ ; #8  $-x+1, -y, -z+1$  for **8**; #1  $-x-1/2, y-1/2, -z+3/2$ ; #2  $x-1/2, -y+3/2, z-1/2$ ; #3  $x-1, y, z$ ; #4  $-x+1, -y+2, -z+1$ ; #5  $x+1, y, z$ ; #6  $-x+1/2, y+1/2, -z+3/2$ ; #7  $x+1/2, -y+3/2, z+1/2$ ; #8  $-x+1/2, y-1/2, -z+3/2$ ; #9  $-x-1/2, y+1/2, -z+3/2$  for **9**.

**Table S2** Conventional hydrogen bonds in crystal packing [ $\text{\AA}$ ,  $^\circ$ ] of **1–4** and **6–9**.

| Complexes | D-H...A            | $d(\text{D-H})$ | $d(\text{H...A})$ | $d(\text{D...A})$ | $\angle \text{DHA}$ | Symmetry code    |
|-----------|--------------------|-----------------|-------------------|-------------------|---------------------|------------------|
| <b>1</b>  | O(4)-H(4)...O(5)   | 0.82            | 1.81              | 2.593             | 160.5               | $x, y, z+1$      |
|           | O(6)-H(6)...O(10)  | 0.82            | 1.70              | 2.463             | 153.1               | $-x+1, -y, -z$   |
|           | O(7)-H(7)...O(3)   | 0.82            | 1.93              | 2.711             | 157.8               | $-x+2, -y, -z+1$ |
|           | O(12)-H(12)...O(9) | 0.82            | 1.79              | 2.593             | 166.4               | $x, y, z+1$      |
|           | O(13)-H(1W)...O(1) | 0.85            | 2.00              | 2.824             | 163.7               | $x-1, y, z$      |

|          |                     |      |      |       |       |                       |
|----------|---------------------|------|------|-------|-------|-----------------------|
|          | O(13)-H(2W)···O(5)  | 0.85 | 2.01 | 2.855 | 169.9 | $-x+1,-y,-z$          |
| <b>2</b> | N(2)-H(4)···O(3)    | 0.86 | 1.84 | 2.696 | 173.4 | $x+1,y+1,z$           |
|          | N(3)-H(5)···O(4)    | 0.86 | 1.90 | 2.762 | 174.3 | $x+1,y+1,z$           |
|          | O(2)-H(1)···O(4)    | 0.82 | 1.68 | 2.482 | 166.8 | $-x+1,-y+1,-z$        |
|          | O(6)-H(2)···O(5)    | 0.82 | 1.82 | 2.629 | 168.4 | $-x+2,-y+2,-z+1$      |
| <b>3</b> | N(2)-H(4)···O(6)    | 0.86 | 1.92 | 2.774 | 172.2 | $-x,-y,-z+1$          |
|          | N(3)-H(5)···O(5)    | 0.86 | 1.85 | 2.699 | 169.2 | $-x,-y,-z+1$          |
|          | O(2)-H(1)···O(6)    | 0.82 | 1.71 | 2.517 | 169.4 | $-x+1,-y,-z+1$        |
|          | O(4)-H(2)···O(3)    | 0.82 | 1.82 | 2.625 | 168.0 | $-x+2,-y+1,-z+2$      |
| <b>4</b> | O(5)-H(5)···O(3)    | 0.82 | 1.68 | 2.482 | 166.0 | $x,y-1,z$             |
|          | O(7)-H(1W)···O(4)   | 0.85 | 1.80 | 2.646 | 179.3 | $-x+1/2,y-1/2,z+1/2$  |
|          | O(7)-H(2W)···O(2)   | 0.85 | 1.83 | 2.677 | 179.0 |                       |
|          | O(8)-H(3W)···O(2)   | 0.85 | 2.03 | 2.875 | 179.8 |                       |
|          | O(8)-H(4W)···O(6)   | 0.85 | 2.08 | 2.926 | 179.8 | $x-1/2,-y+1/2,z$      |
|          | O(9)-H(6W)···O(4)   | 0.85 | 2.07 | 2.917 | 179.5 | $-x+1,-y+1,z+1/2$     |
| <b>6</b> | O(8)-H(8A)···O(3)   | 0.85 | 2.33 | 2.876 | 122.5 | $-x+2,y-1/2,-z+1/2$   |
|          | O(8)-H(8B)···O(4)   | 0.70 | 2.12 | 2.794 | 163.6 | $x+1/2,y-1/2,z$       |
|          | O(7)-H(7A)···O(2)   | 0.86 | 1.73 | 2.551 | 159.0 |                       |
|          | O(7)-H(7B)···O(5)   | 0.85 | 1.76 | 2.578 | 160.0 | $-x+1/2,-y+3/2,-z$    |
| <b>7</b> | O(7)-H(7A)···N(3)   | 0.89 | 1.85 | 2.739 | 173.1 | $-x,y,-z+1/2$         |
|          | O(7)-H(7B)···O(1)   | 0.89 | 1.92 | 2.776 | 160.1 | $-x,y,-z+1/2$         |
|          | O(8)-H(8A)···O(5)   | 0.86 | 1.72 | 2.575 | 169.0 | $x,-y+2,z+1/2$        |
|          | O(8)-H(8B)···O(3)   | 0.86 | 1.73 | 2.585 | 169.0 | $-x+1/2,y-1/2,-z+1/2$ |
| <b>8</b> | O(8)-H(1W)···O(6)   | 0.82 | 1.95 | 2.743 | 163.1 | $-x,-y+2,-z-1$        |
|          | O(8)-H(2W)···O(2)   | 0.85 | 2.02 | 2.869 | 179.6 |                       |
|          | O(9)-H(3W)···O(12)  | 0.82 | 1.81 | 2.629 | 173.8 | $-x,-y+1,-z$          |
|          | O(9)-H(4W)···O(2)   | 0.76 | 2.08 | 2.778 | 152.3 | $-x,-y+1,-z$          |
|          | O(10)-H(5W)···O(15) | 0.82 | 1.99 | 2.800 | 168.5 | $x,y+1,z-1$           |
| <b>9</b> | O(13)-H(1W)···O(6)  | 0.85 | 2.09 | 2.941 | 179.2 | $-x+1,-y+2,-z+1$      |
|          | O(13)-H(2W)···O(8)  | 0.88 | 1.87 | 2.636 | 144.9 |                       |

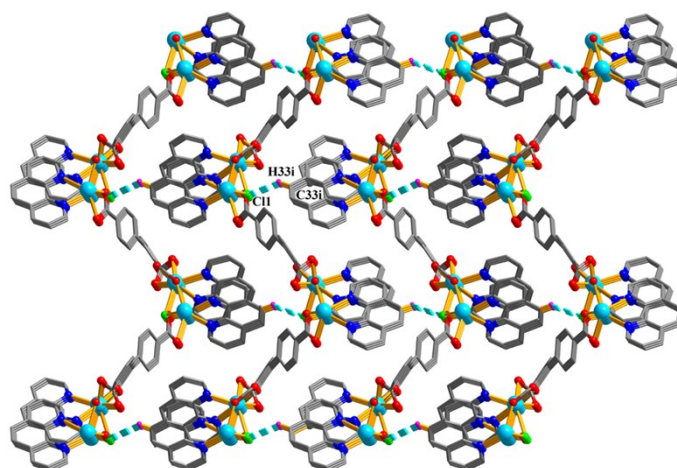

**Fig. S1** 3D structure formed by the hydrogen bonds in **5** (blue dashed lines present the H-bond).

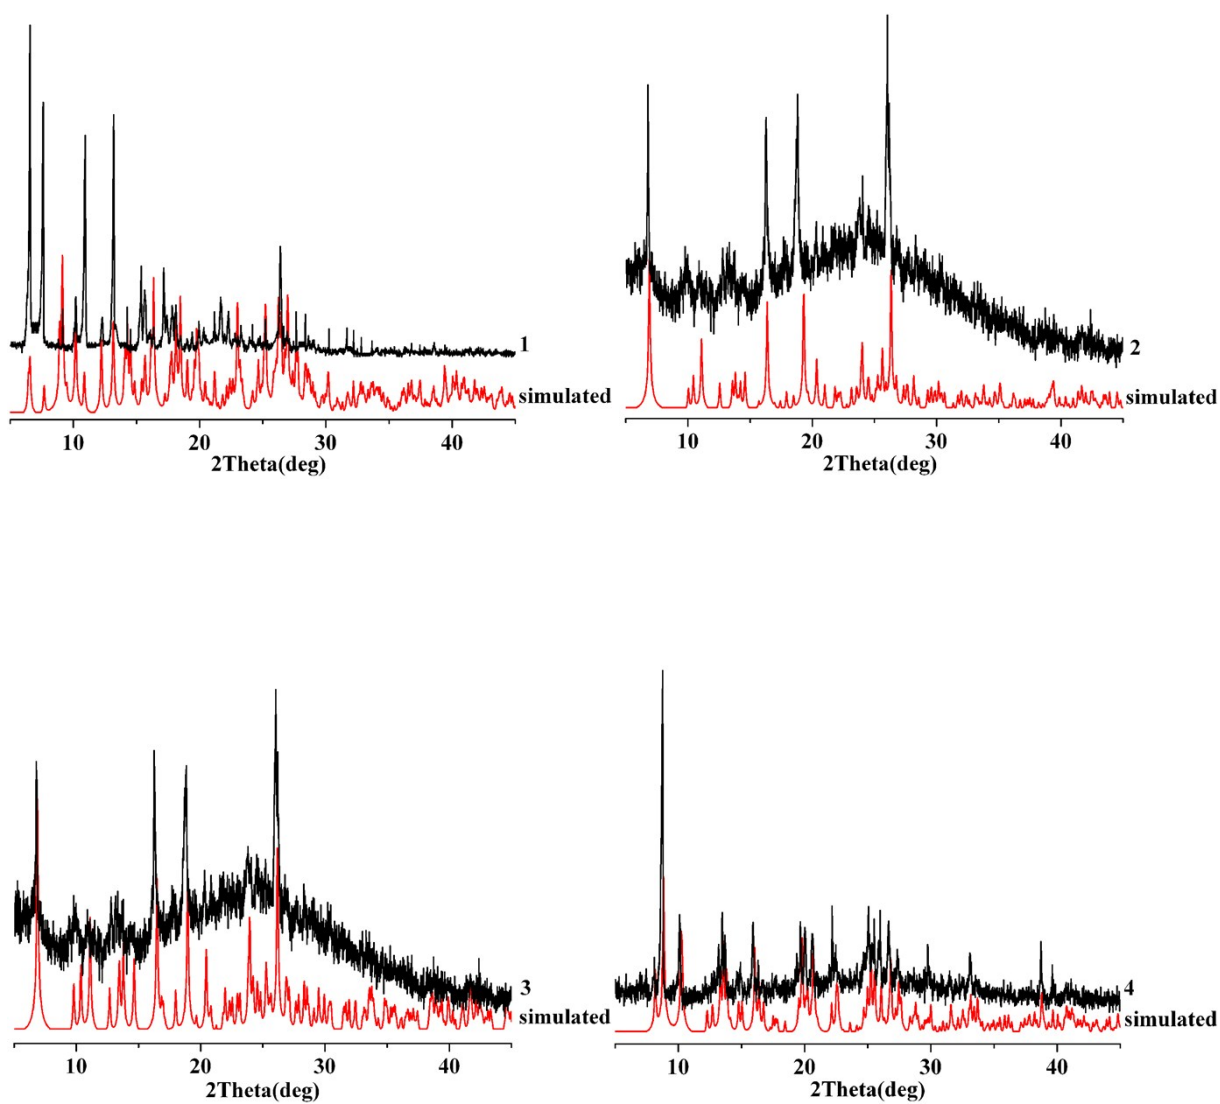

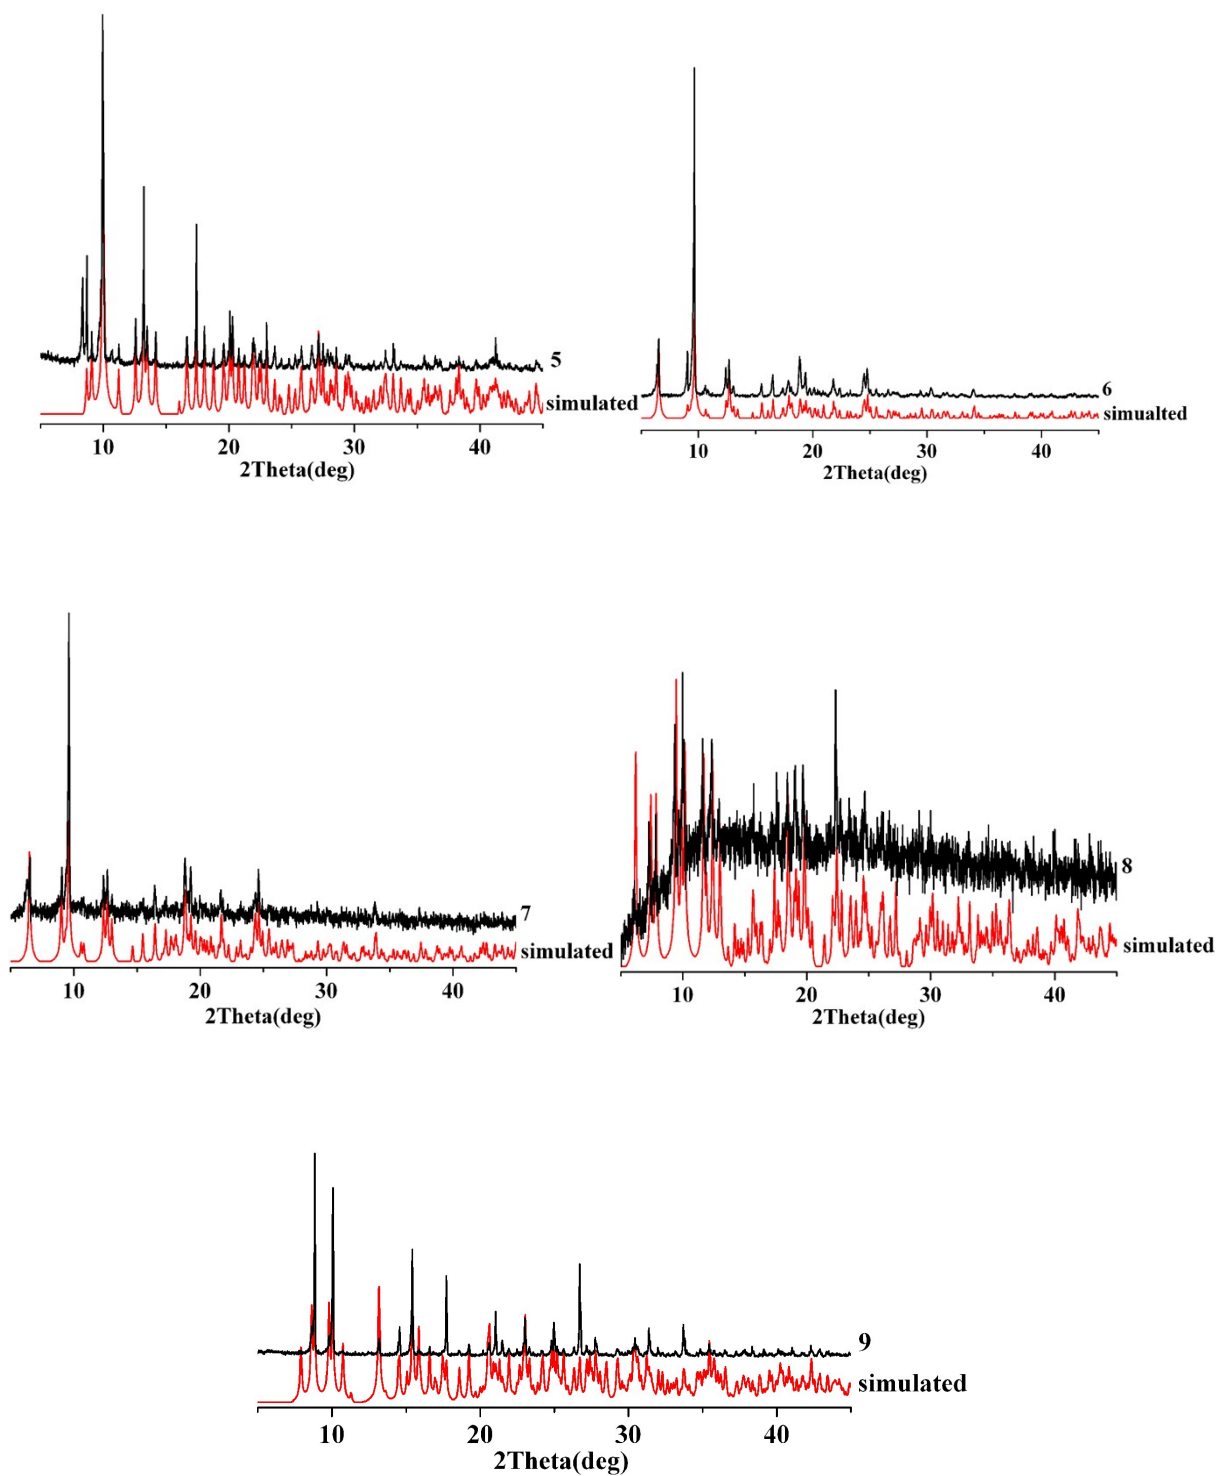

**Fig. S2** The PXRD patterns of compounds **1–9** at room temperature. Black patterns correspond to the experimental data obtained using the as-synthesized bulk samples. Red patterns have been simulated from the single crystal X-ray data.
